# Supplementary material for: Comparative transcriptomics and comprehensive marker resource development in mulberry
Source: PubMed Central journal article supplement (PMC4743097; doi:10.1186/s12864-016-2417-8), 2016-02-04
Supplement: 12864_2016_2417_MOESM1_ESM.pdf [file 12864_2016_2417_MOESM1_ESM.pdf]

A.

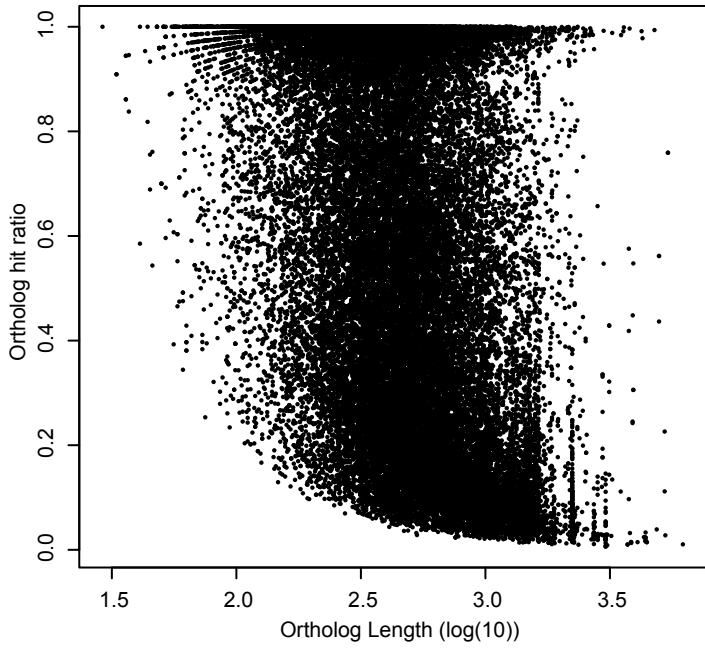

B.

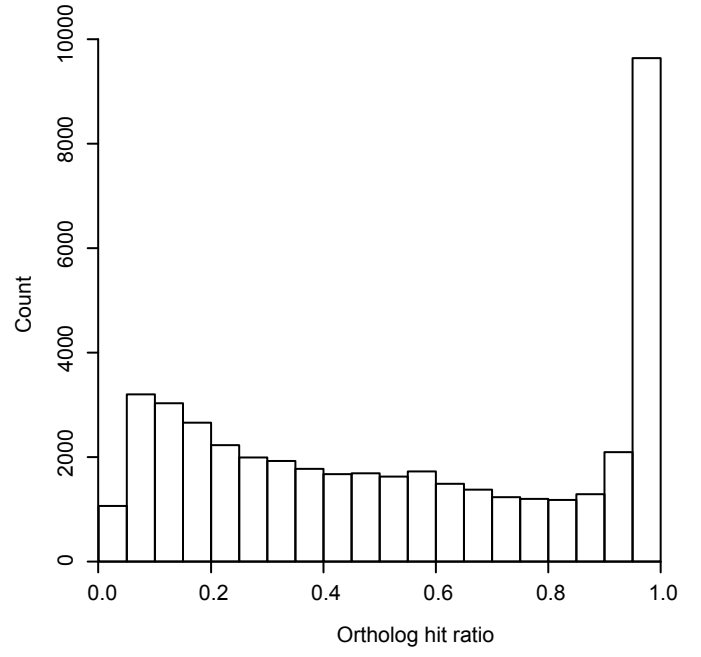

C.

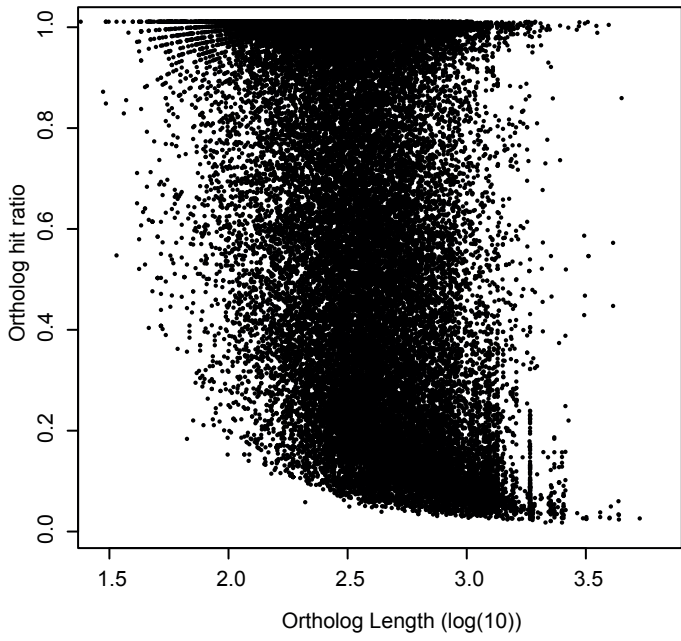

D.

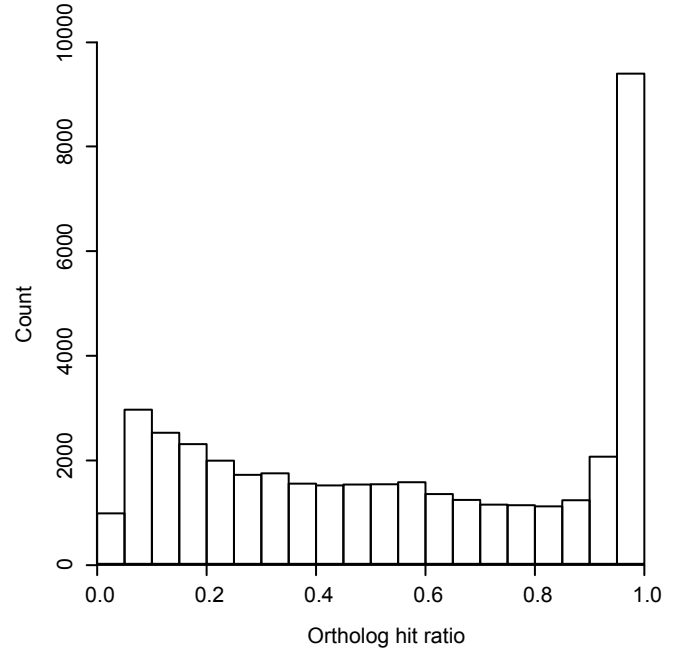

Supporting Figure 1.
